# Supplementary material for: Cardiac automaticity is modulated by IKACh in sinoatrial node during pregnancy
Source: PubMed Central journal article supplement — Cardiovasc Res. 2024 Sep 11;120(17):2208–19. doi: 10.1093/cvr/cvae200 (PMC11687396; doi:10.1093/cvr/cvae200), 2024-09-11
Supplement: cvae200_supplementary_data.pdf [file cvae200_supplementary_data.pdf]

## Cardiac automaticity is modulated by I<sub>KACH</sub> in sinoatrial node during pregnancy.

Long V, El Gebeily G, Leblanc É, Senhadji M, Fiset C.

---

### **SUPPLEMENTAL DATA**

**Table S1.** Sequences of primers.

| <b>Primers</b> | <b>Sequences</b>                                                                                               |
|----------------|----------------------------------------------------------------------------------------------------------------|
| <i>Kcnj3</i>   | <b>Forward:</b> 5' CAG TTC GAG GTT GTC GTC ATC C 3'<br><b>Reverse:</b> 5' CCC AAA GCA CTT CGT CCT CTG T 3'     |
| <i>Kcnj5</i>   | <b>Forward:</b> 5' GGA GAT GTC TCG TGC TCA ACT G 3'<br><b>Reverse:</b> 5' CCA GAG CAC CTC TGT ATC CAT G 3'     |
| <i>Adora1</i>  | <b>Forward:</b> 5' ATC CCT CTC CGG TAC AAG ACA GT 3'<br><b>Reverse:</b> 5' ACT CAG GTT GTT CCA GCC AAA C 3'    |
| <i>Chrm2</i>   | <b>Forward:</b> 5' GTC AGC AAT GCC TCC GTT AT 3'<br><b>Reverse:</b> 5' CCT ACG ATG AAC TGC CAG AA 3'           |
| <i>Rgs4</i>    | <b>Forward:</b> 5' AGT CAG ATT CCT GCG AAC AC 3'<br><b>Reverse:</b> 5' TCC TCG CTG TAT TCC GAC TT 3'           |
| <i>Rgs6</i>    | <b>Forward:</b> 5' AAT CTC AGG TTC TGG CTG TCT GTC 3'<br><b>Reverse:</b> 5' TTG CCA GAT TTC CTC CAC CCT CTT 3' |
| <i>Hprt</i>    | <b>Forward:</b> 5' TGA ATC ACG TTT GTG TCA TTA GTG A 3'<br><b>Reverse:</b> 5' TTC AAC TTG CGC TCA TCT TAG G 3' |
| <i>Sdha</i>    | <b>Forward:</b> 5' GAG GAA GCA CAC CCT CTC ATA 3'<br><b>Reverse:</b> 5' GCA CAG TCA GCC TCA TTC AA 3'          |
| <i>Cyclo</i>   | <b>Forward:</b> 5' CCG ATG ACG AGC CCT TGG 3'<br><b>Reverse:</b> 5' GCC GCC AGT GCC ATT ATG 3'                 |

**Cardiac automaticity is modulated by  $I_{KACH}$  in sinoatrial node during pregnancy.**

Long V, El Gebeily G, Leblanc É, Senhadji M, Fiset C.

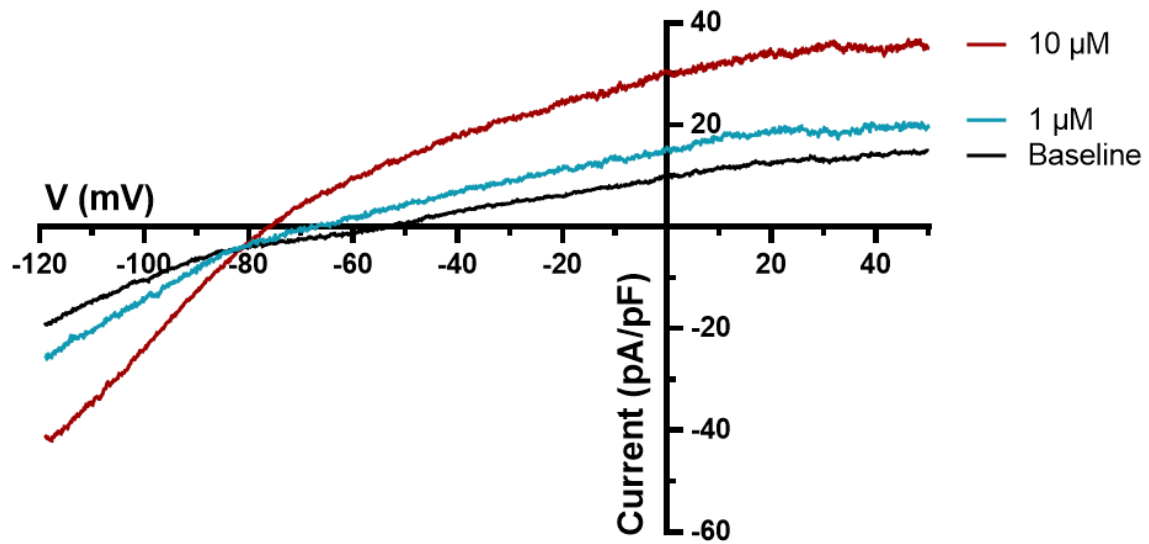

**Figure S1. Activation of the G-protein-gated  $K^+$  current  $I_{KACH}$  by carbachol (CCh).** IV curves under baseline condition (black), in presence of CCh at 1  $\mu$ M (blue) and 10  $\mu$ M (red).

## Cardiac automaticity is modulated by $I_{KACH}$ in sinoatrial node during pregnancy.

Long V, El Gebeily G, Leblanc É, Senhadji M, Fiset C.

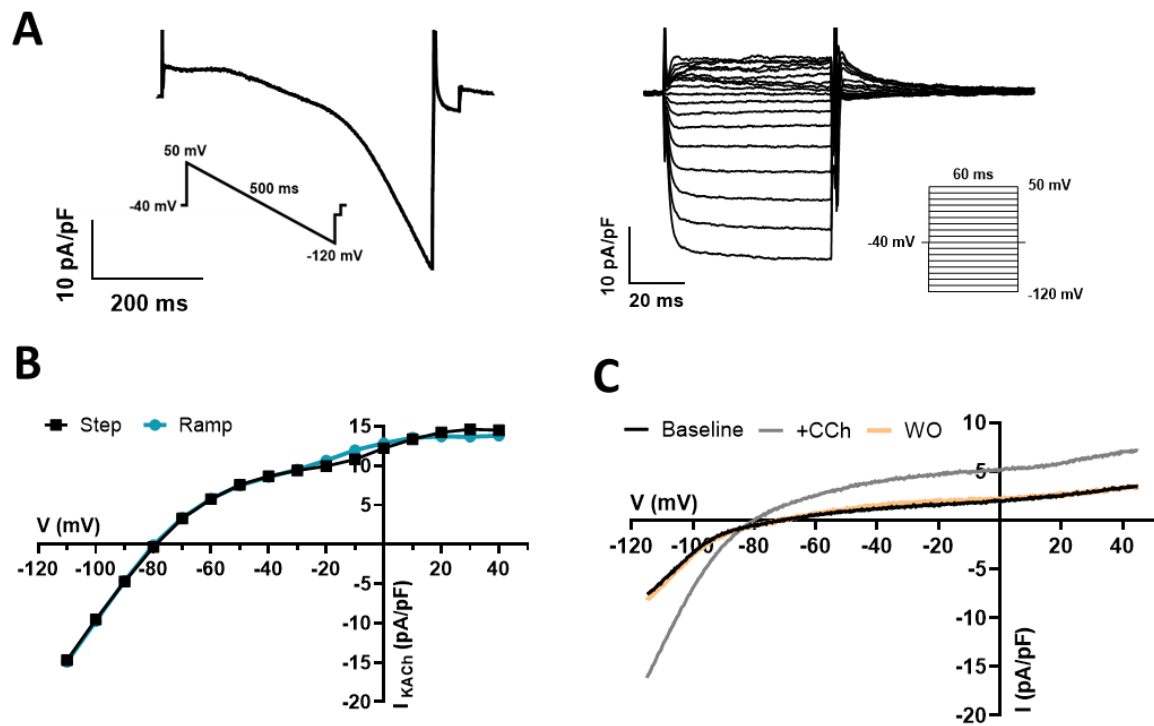

**Figure S2. Comparison of a ramp and voltage-step protocol for  $I_{KACH}$  recording. (A)**

Comparison of  $I_{KACH}$  recorded from a ramp (500 ms ramp from +50 mV to -120 mV with a holding potential of -40 mV) and a step (60-ms steps ranging between +50 mV to -120 mV in 10-mV increments from a holding potential of -40 mV) protocol on NP SAN cells. Insets show ramp and steps protocols. **(B)** Current-voltage (IV) curves of  $I_{KACH}$  recorded with both voltage-clamp protocols were comparable. **(C)** IV curves of baseline, acetylcholine-activated (+CCh; carbachol, 10  $\mu$ M) and washout (WO) current. Complete return to baseline values is observed in WO conditions.

## Cardiac automaticity is modulated by $I_{KACH}$ in sinoatrial node during pregnancy.

Long V, El Gebeily G, Leblanc É, Senhadji M, Fiset C.

---

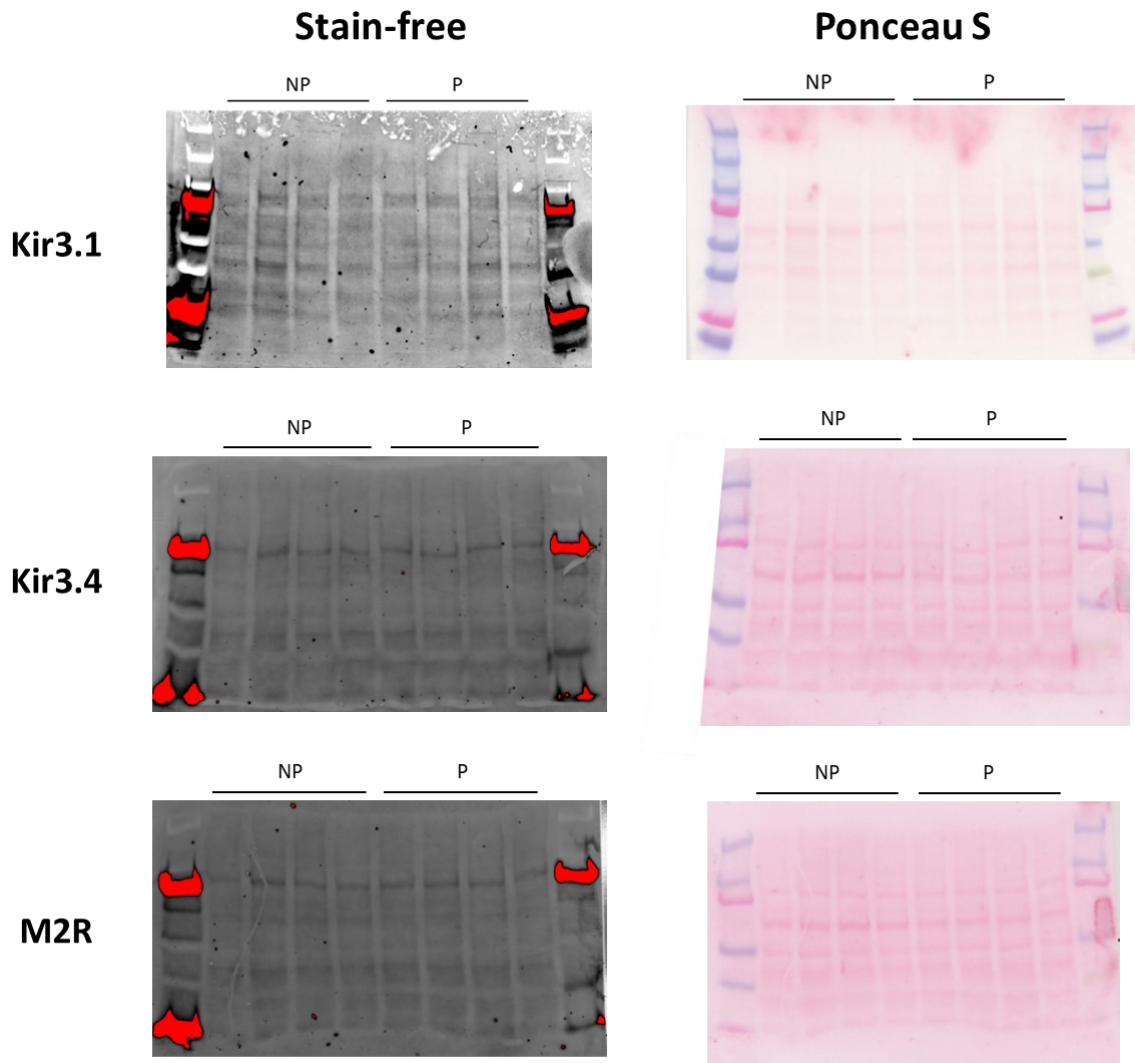

**Figure S3. Stain-free blots used to normalize Kir3.1, Kir3.4 and M2R expression. (left)** Protein (20  $\mu$ g) isolated from NP and P mice (N=4 per group) were visualized using stain-free technology. All visible bands were used for normalization of Kir3.1 (*upper*), Kir3.4 (*middle*) and M2R (*lower*). (**right**) Ponceau S of the nitrocellulose membrane right after the transfer and the stain-free image obtained with the ChemiDoc system.
